# Supplementary material for: The Scent of Blood: A Driver of Human Behavior?
Source: PLoS One. 2015 Sep 23;10(9):e0137777. doi: 10.1371/journal.pone.0137777 (PMC4580480; doi:10.1371/journal.pone.0137777)
Supplement: S1 Dataset — (XLS) [file pone.0137777.s001.xls]

## Sheet: Sheet1
Age	Gender	blood_scent_threshold	butyric_scent_threshold	SAM_blood_threshold_concentration	SAM_Valence_blood_threshold	SAM_Arousal_blood_threshold	SAM_Dominance_blood_thresdhold	SAM_Valence_blood_above_threshold	SAM_Arousal_blood_above_threshold	SAM_Dominance_blood_above_threshold	SAM_butyric_threshold_concentration	SAM_Valence_butyric_threshold	SAM_Arousal_butyric_threshold	SAM_Dominance_butyric_threshold	SAM_Valence_butyric_above_threshold	SAM_Arousal_butyric_above_threshold	SAM_Dominance_butyric_above_threshold	SAM_Valence_water	SAM_Arousal_water	SAM_Dominance_water	SAM_Valence_floral	SAM_Arousal_floral	SAM_Dominance_floral	vegetarian_or_vegan	cycle_contraception	cycle_phase	cycle_day	cycle_duration	fertile	contraception_main	non_contraception_fertile	blood_positive	cycle_status1	associations
21	0	8.25		8	-1	4	-2																	1		.	.	.						familiar unpleasant
24	0	9	5.5	9	0	7	2				6	-2	7	-2	-4	9	2							0	0	.	.	.						hospital, alcohol
24	1	8.25	6.25	9	2	3	0				6	0	3	0	-2	5	-2							0		.	.	.						roses, flowers
23	0	15.5	4.5	15	3	4	1	-3	8	-1	4	-2	2	0	0	3	0							0	1	1	8	28	0	1	0	-1	3	unclean
24	0	11	0	11	-2	3	0	-4	9	0	1	-4	7	-4										0	1	1	5	28	0	1	0	-1	3	new
22	1	11		11	0	1	0	2	4	0	7	0	6	0										1		.	.	.				1		flower field
21	0	9.5		9	0	1	0	-2	7	-2	7	-4	1	-4										0	0	1	18	23	0	-1	1	-1	1	peanuts
25	1	9.75		9	-2	4	-2	-4	2	-4	7	-4	7	0										0		.	.	.				-1		wood, sandelwood
25	0	9.75		9	2	1	0	-3	7	-2	7	-4	9	-4										0	0	1	5	33	0	-1	1	-1	1	nature, forest, wood
37	0	9.5		9	1	4	0	3	7	1	7	-4	8	-1										0	0	1	18	30	1	-1	-1	1	2	rose, iodine, pharmacy, homeopathic substance, coffee
33	1	8.5		8	0	1	0	2	7	2	7	-2	7	0										0		.	.	.				1		swimming pool, elektrolyte, petrol station, marzipan
26	0	8.5	8.75	8	0	1	0	-1	3	0	8	0	1	0	-4	3	0							0	1	1	29	28	0	1	0	-1	3	stagnant
25	0	8.75	7.5	8	0	1	0	2	6	2	7	-1	3	-2	1	6	1							0	1	1	11	28	0	1	0	1	3	olive oil
24	1	9.5	9.5	9	0	3	-1	-2	7	-1	9	0	3	0	-2	5	-1							0		.	.	.				-1		saw, pressed wood
40	1	8.5	8.5	8	2	5	-1	-4	1	-4	8	-2	3	-2	-4	1	-2							0		.	.	.				-1		old room
35	0	8.5	9.5	8	2	7	1	-2	7	0	9	-2	7	1	-4	7	0							0	0	1	8	28	0	-1	1	-1	1	hospital
34	1	8.5	10.5	8	3	2	2	3	2	2	10	2	4	2	-2	6	0							0		.	.	.				1		oil
21	0	7.75	9.5	7	2	4	2	-1	5	0	9	-3	4	-1	0	3	0							0	1	1	7	28	0	1	0	-1	3
24	0	14.5	16	14	-4	9	-4	-4	7	-4	16	0	3	-2	0	5	-2							0	1	1	16	25	0	1	0	-1	3	building material,
21	0	8.75	9.5	8	-1	3	0	-3	7	-3	9	-2	4	-1	-2	5	0							0	1	1	2	28	0	1	0	-1	3	farm, machines
29	1	8	9.5	8	2	6	0	2	7	2	9	-1	6	2	-2	7	0							0								1
26	1	10	13.5	10	0	1	0	-2	7	-1	13	-1	3	0	-4	8	-2							0		.	.	.				-1		rose petals in bath
25	1	8.25	12.5	8	0	3	1	-2	7	3	12	-1	2	-2	-2	6	-1							0		.	.	.				-1		oil, nothing positive
25	1	8.75	9.5	8	0	2	0	0	4	0	9	-2	3	0	-3	3	0							1		.	.	.						roasted nuts,
21	1	8.5	8.75	8	0	1	2	4	1	4	8	-2	7	-2	-4	9	-4							1		.	.	.				1		nuts,
24	1	7.5	9.75	7	1	3	0	-2	3	-1	9	-1	7	1	-2	7	3							0		.	.	.				-1		laquer
25	0	8.5	9.5	8	-1	6	-1	1	7	1	9	-1	3	-1	-3	6	-2	0	1	0				0	0	1	17	30	1	-1	-1	1	2	bread vegetables pale wood
24	0	11.5	8.75	11	3	6	2	1	6	1	8	-2	5	-2	-3	5	-3	2	3	2				0	0	1	7	31	0	-1	1	1	1	swimming pool
20	0	14	16	14	2	1	0	-4	5	0	15	1	1	2	-4	8	-4	2	1	2				0	1	1	9	28	0	1	0	-1	3	mouldy mushrooms
28	1	8.75	12.5	8	-2	8	-3	-4	9	2	12	4	5	4	-2	3	0	0	1	0				0		.	.	.				-1		bitter, familiar
23	0	9	13	9	-2	3	0	-4	9	0	13	-3	2	2	-4	8	2	-2	4	0				0	1	1	13	28	1	1	0	-1	3	beer
28	0	8.25	10.25	8	-1	3	-2	-2	8	-3	10	0	3	0	-3	7	-1	-2	2	-1	4	8	2	0	1	1	20	28	0	1	0	-1	3	steril
21	0	8.5	16	8	-1	7	0	-3	8	0	16	2	4	-1	-1	3	-3	2	3	-2	4	9	4	0	1	1	16	28	1	1	0	-1	3	chemistry lessend, biting, sour
21	1	7.75	15	7	3	5	-2	0	1	0	15	3	5	1	-4	7	2	0	3	-2	2	9	2	1		.	.	.						special hospital in Afrika
28	1	11.25	13.75	11	2	3	0	-2	7	-2	13	-2	7	0	-2	6	0	1	6	2	3	5	-1	0		.	.	.				-1		rubber burning, factory
22	0	9.5	10.5	9	-1	3	-1	-4	6	0	10	-1	1	0	-4	6	-2	0	2	0	1	3	1	0	1	1	30	28	0	1	0	-1	3	rust, swimming pool
20	0	13.3	11	13	0	2	2	-3	5	2	11	-1	3	2	-4	5	2	2	1	1	-2	3	2	0	1	1	26	28	0	1	0	-1	3	chemistry lesson, familiar
20	0	8.5	15.5	15	2	3	0	3	5	-2	8	-4	5	-1	-4	3	-2	2	4	0	1	5	0	1	1	1	22	28	0	1	0	1	3	forest, autumn, mushrooms
26	1	13.5	11.5	13	-2	6	1	-4	8	-1	11	1	3	-2	-4	8	-1	0	4	-1	0	7	2	0		.	.	.				-1		swimming pool
25	1	11.25	12.5	11	1	7	1	-2	9	2	12	2	7	1	-4	9	-3	0	3	0	4	9	4	1		.	.	.				-1		old basement, unfamiliar
23	0	11.75	10.5	11	1	6	1	1	7	1	10	2	7	1	-2	6	0	-1	6	0	2	7	1	0	0	1	4	34	0	-1	1	1	1	paint thinner
23	1	13.75	13	13	-1	2	-1	1	5	2	12	-2	3	-2	-3	6	-2	0	3	0	0	5	0	0		.	.	.				1		tomato leaves
23	0	9.5	12.75	9	2	1	0	-2	4	-2	12	2	5	2	-2	3	-3	1	2	0	3	5	2	1	0	1	18	26	0	-1	1	-1	1	wet chalk
28	0	7.5	13.25	7	-2	1	-2	2	7	2	13	-2	7	-4	0	3	0	0	3	-2	2	7	2	0	0	1	3	28	0	-1	1	1	1	clinic, spring
22	1	8.5	8.5	8	0	1	0	-4	3	-2	8	-2	3	0	-2	5	0	0	1	0	2	5	0	0		.	.	.				-1		gyprock, wood, cartons
21	1	10.75	13.25	10	2	8	2	-1	7	-1	13	-2	5	0	1	4	-1	-1	7	0	1	3	0	0		.	.	.				-1		chemistry lesson, stuffy
25	1	16	8.5	8	1	4	-1	-1	5	-1	8	-3	7	-2	-4	3	-2	0	2	0	2	7	2	1		.	.	.				-1		nuts
22	0	10.25	9	10	-4	6	1	-1	4	0	8	-4	8	-2	-4	8	-3	-1	8	2	4	8	2	1	1	1	10	28	0	1	0	-1	3	feminine
26	1	6.5	9.75	6	0	1	0	-1	2	-1	9	0	1	0	-2	5	0	1	1	0	1	5	-1	1		.	.	.				-1		peach
22	0	13	12.5	12	-2	4	-1	-2	5	-2	12	-1	2	-1	-2	3	-1	2	3	0	2	5	0	0	1	1	35	28	0	1	0	-1	3	brazil
	1	8.5	13.5	8	1	3	1	-2	6	1	13	-2	5	-2	-1	3	0	1	3	1	2	4	2	1		.	.	.				-1		no associations
20	0	12	9.5	11	0	1	0	-2	3	0	9	-2	3	0	-4	5	-4	0	1	0	3	3	0	0	1	1	3	28	0	1	0	-1	3	wood mildew forest
20	0	10.75	11.75	10	-2	4	-1	-3	6	-1	11	0	5	0	-1	7	0	-1	5	-1	1	7	2	0	1	1	10	28	0	1	0	-1	3	gloss paint
20	1	9.5	8.5	9	1	3	1	-1	4	-1	8	-2	5	-2	-2	5	-3	0	1	0	3	8	3	0		.	.	.				-1		severe
22	0	11.5	10	11	-1	2	-3	-3	5	-1	9	-2	2	-2	-4	5	-1	2	4	-2	1	6	0	1	1	1	23	28	0	1	0	-1	3	plastic toy
26	1	13.5	13.5	13	2	6	2	2	7	2	13	1	6	1	-2	1	0	2	7	1	3	7	2	0		.	.	.				1		mushroom, moist forest
25	1	9.5	8.75	9	2	6	0	-2	7	-3	8	-2	6	-4	-4	8	-4	-1	3	-2	2	6	1	0		.	.	.				-1		mushroom
23	1	9.5	9.75	9	1	3	1	-2	4	-1	9	-1	8	2	-3	5	-3	1	3	2	1	4	1	1		.	.	.				-1		no association
34	0	11	9.75	10	2	7	-1	2	6	0	9	-2	1	-2	1	5	-1	0	2	-3	4	7	0	0	1	1	26	28	0	1	0	1	3	wood stain
27	1	9	8.75	9	-1	7	1	-2	3	-1	8	-2	8	2	-2	3	0	-1	3	-1	0	6	1	0		.	.	.				-1		disinfectant
30	0	15.5	10.5	15	0	1	0	0	5	1	10	-4	7	1	-4	9	1	2	3	0	2	6	2	0	1	1	31	25	0	1	0		3	earth
33	1	8.5	11	8	0	3	0	2	7	2	11	0	3	0	-4	5	0	0	3	-1				0		.	.	.				1
26	1	9	10.5	9	-2	4	2	-2	5	1	10	-1	3	-1	-2	4	-1	1	2	-1				0		.	.	.				-1		blood, haemoglobin, iron
25	1	6.25	10.5	6	-2	3	1	1	3	0	10	-4	6	1	-4	7	-1	0	5	0				0		.	.	.				1		glue
29	1	9	8.75	8	-2	6	-2	-2	3	0	8	-1	6	-1	-2	7	-2	2	5	1				1		.	.	.				-1		blood, metallic color water
27	1	11.5	8.75	11	2	5	0	2	7	0	8	-4	8	-2	-2	7	-2	2	7	0				0		.	.	.				1		sickly sweet
35	1	7	11	7	0	3	0	3	3	0	11	-2	5	0	-1	5	0	1	1	0				0		.	.	.				1		forest
21	1	13.5	9.75	13	0	2	0	3	7	2	9	-2	6	-2	-2	8	-3	0	2	0				0		.	.	.				1		non-edible mushrooms, champignons
21	1	13.25	8.5	13	1	3	0	1	5	1	8	-2	7	-4	-3	7	-3	2	3	-2				1		.	.	.				1		flowers, wine grapes
27	0	11.75	8.75	11	-1	1	0	-2	3	-3	8	-2	5	-2	-4	6	-4	1	1	0				0	0	1	30	31	0	-1	1	-1	1	mothballs, old wardrobe
21	0	11.5	10.5	11	-2	5	-2	-4	7	-2	10	-1	6	0	-4	8	-2	0	3	0				0	1	1	5	28	0	1	0	-1	3	no association
20	1	10.25	16	10	2	3	2	-2	3	2	16	0	7	-2	-2	3	0	2	5	0	0	3	-2	0		.	.	.				-1		plants, washing detergent
20	0	10	8.75	8	-1	1	-1	1	4	2	9	-1	3	0	-2	5	0	0	1	0	2	4	1	0	0	1	8	30	0	-1	1	1	1	nut, christmas market, swimming pool, plastic
22	0	10.25	10.75	10	-3	6	-2	-4	9	-4	10	-1	2	0	-3	7	-3	-2	1	-1	2	6	2	1	1	1	20	28	0	1	0	-1	3	carpet
26	1	7	10	7	-1	2	0	1	3	1	9	-2	3	1	1	4	0	-1	2	0	-2	4	0	0		.	.	.				1		lead
26	0	10.25	10.25	10	-2	5	1	2	7	2	10	-2	5	0	-2	7	2	0	1	0	2	9	0	0	0	1	15	29-32	1	-1	-1	1	2	glue paste
24	1	8.75	10.5	8	-2	7	-1	3	8	1	10	-1	2	0	-3	8	-2	0	3	0	3	8	2	0		.	.	.				1		new car, plastic
23	1	7.5	9.75	7	2	5	2	2	5	2	9	-2	5	-2	-2	7	-2	0	2	0	2	3	0	0		.	.	.				1		pears
20	1	8.5	9.75	8	2	5	1	-4	7	-1	9	-1	6	-1	2	7	2	-1	3	1	4	9	4	0		.	.	.				-1		vomit
20	0	15.5	16	15	-2	5	0				15	-3	7	-1	0	4	1	-2	4	-2	-3	7	-3	0	0	1	8	29	0	-1	1		1	hostpital, medicine, tablet, stitches, acute
20	1	7.75	9	7	2	6	2	1	7	0	9	-1	5	1	-2	7	-2	2	5	2	3	6	1	0		.	.	.				1		orange
22	0	7.5	9.5	7	-1	6	0	-3	7	-2	9	-2	5	-2	-3	7	-4	0	1	-1	2	8	3	0	1	1	8	27	0	1	0	-1	3	chemistry lecture theater
20	0	8.25	8.5	8	1	4	-1	2	7	0	8	-2	5	-1	1	5	0	1	3	0	2	7	1	1	0	1	11	25	1	-1	-1	1	2	metal, iron, orange
23	1	6.75	8.5	6	-3	4	-2	-2	5	-3	8	-3	7	-3	-4	9	-4	0	1	-1	2	7	1	0		.	.	.				-1		chemistry, fresh fitted carpet
26	0	13.5	10	13	2	3	0	-2	5	-2	10	-1	3	0	0	5	0	0	1	0	2	3	0	0	1	1	23	28	0	1	0	-1	3	forest
29	1	9	8.5	9	1	4	0	-2	4	-1	8	-1	1	0	-2	1	0	1	1	0	-2	1	0	0		.	.	.				-1		colour
39	0	11.5	8.75	11	-2	5	-2	-2	5	0	8	-2	5	-2	-2	3	0	0	3	-2	2	7	0	0	0	1	24	28	0	-1	1	-1	1	strong oil
23	0	10	13	10	-1	6	-1	-2	3	-2	12	2	6	-2	-4	4	1	-2	3	-1	4	6	0	0	1	1	15	28	1	1	0	-1	3	metallic
25	1	9.5	11.5	11	-2	1	0	-4	3	0	9	-1	1	0	-1	1	0	0	1	0	4	1	0	0		.	.	.				-1		mushroom, lemon
